# Supplementary material for: Early cross-coronavirus reactive signatures of protective humoral immunity against COVID-19
Source: PubMed Central journal article supplement (PMC8132219; doi:10.1101/2021.05.11.443609), 2021-05-12

| <b>#samples/#patients</b> | <b>deceased</b> | <b>severe</b> | <b>moderate</b> | <b>Total</b> |
|---------------------------|-----------------|---------------|-----------------|--------------|
| <b>day 0-3</b>            | 14/14           | 21/21         | 43/43           | 78/78        |
| <b>day 3-6</b>            | 22/22           | 42/42         | 77/77           | 141/141      |
| <b>day 6-9</b>            | 17/17           | 50/50         | 76/76           | 143/143      |
| <b>day 9-12</b>           | 17/17           | 38/38         | 52/52           | 107/107      |
| <b>Total</b>              | 70/37           | 151/62        | 248/118         | 469/217      |

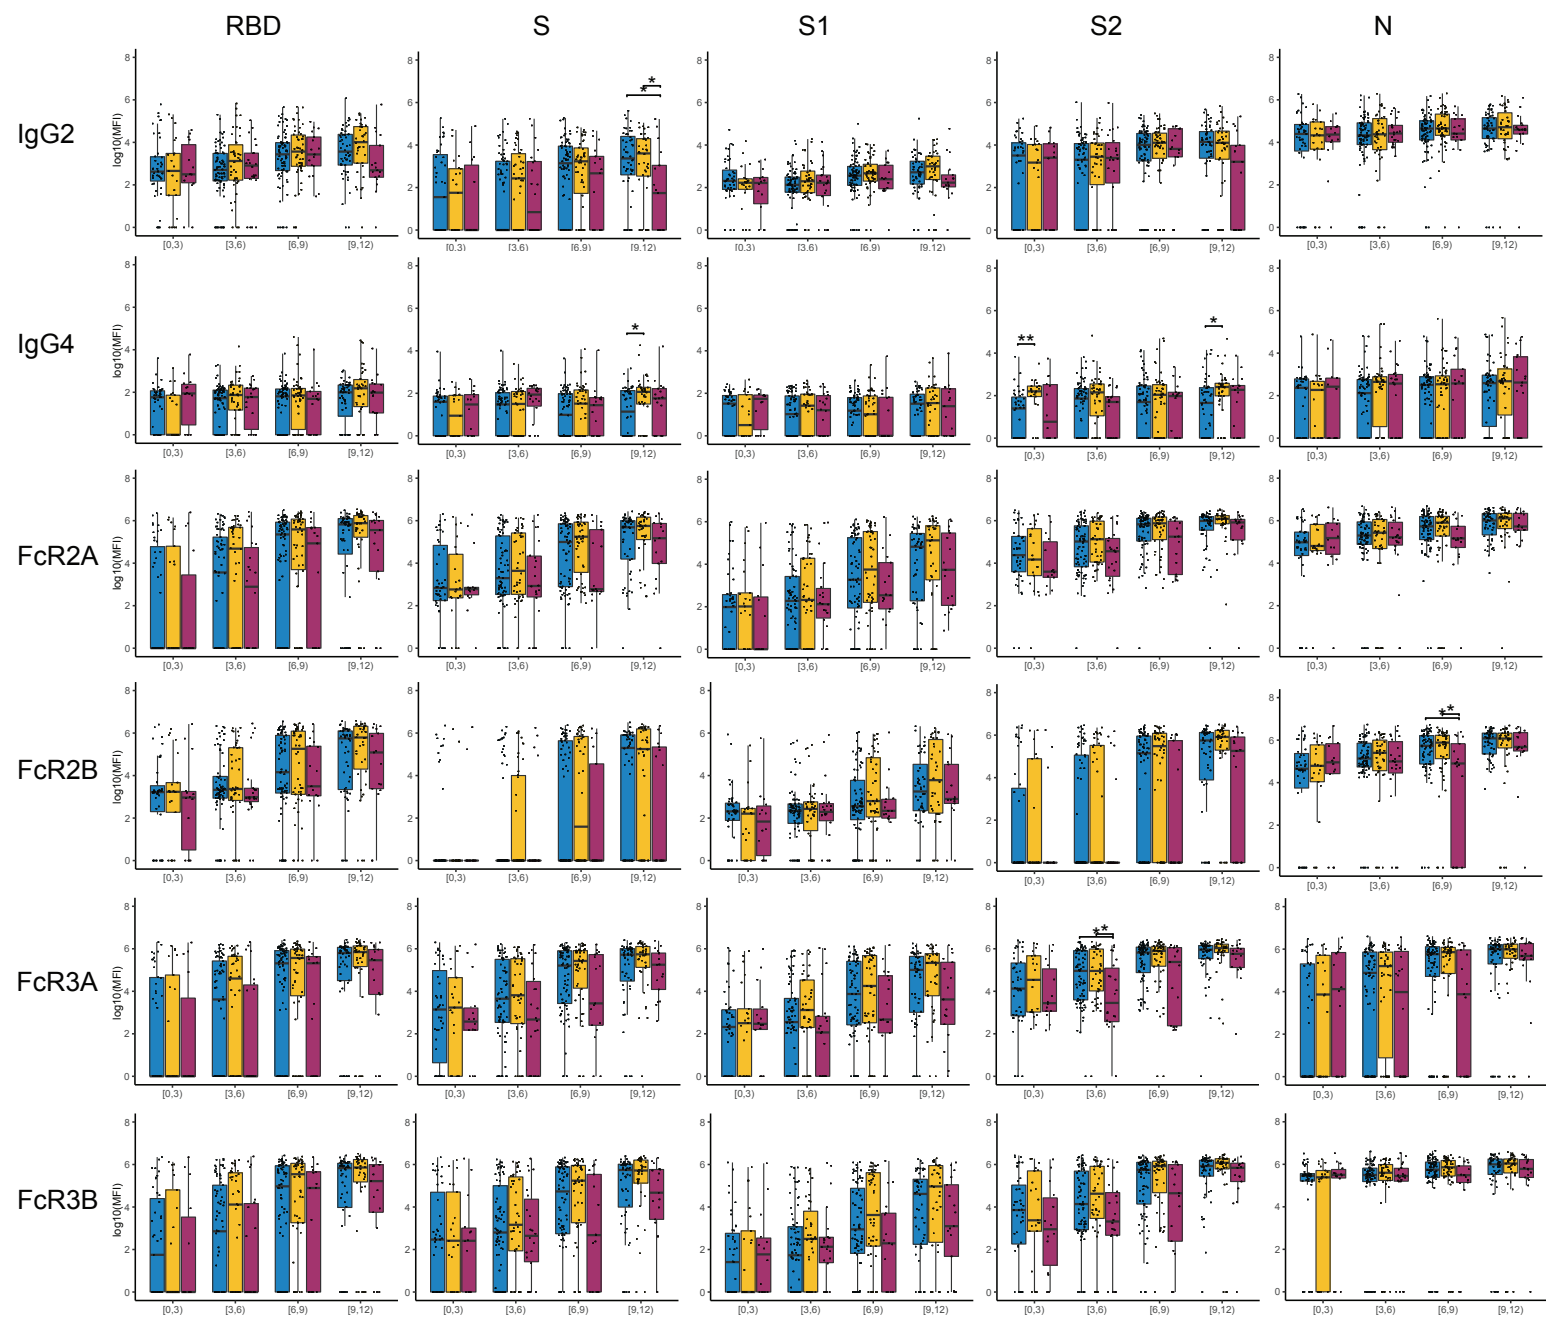

Supplemental Figure 1

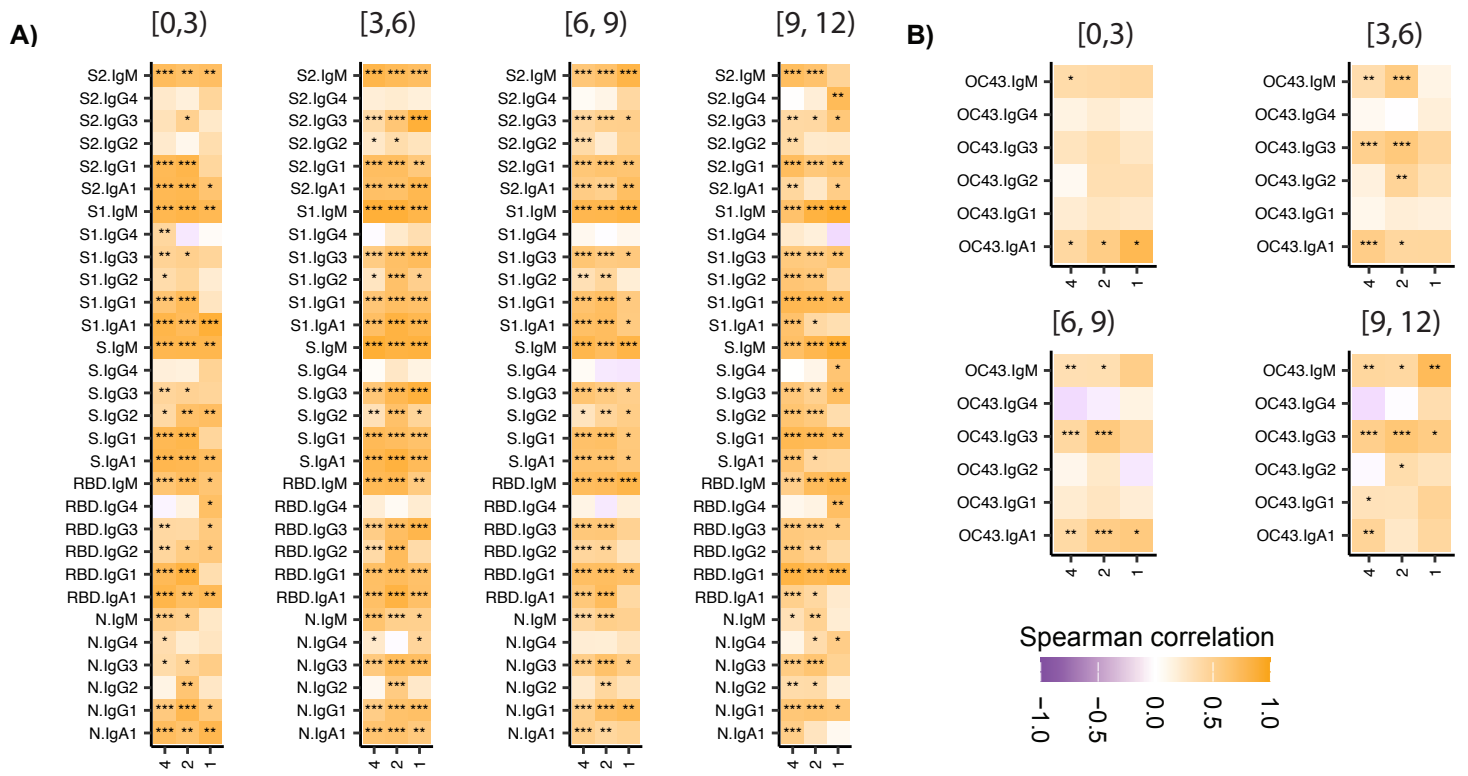

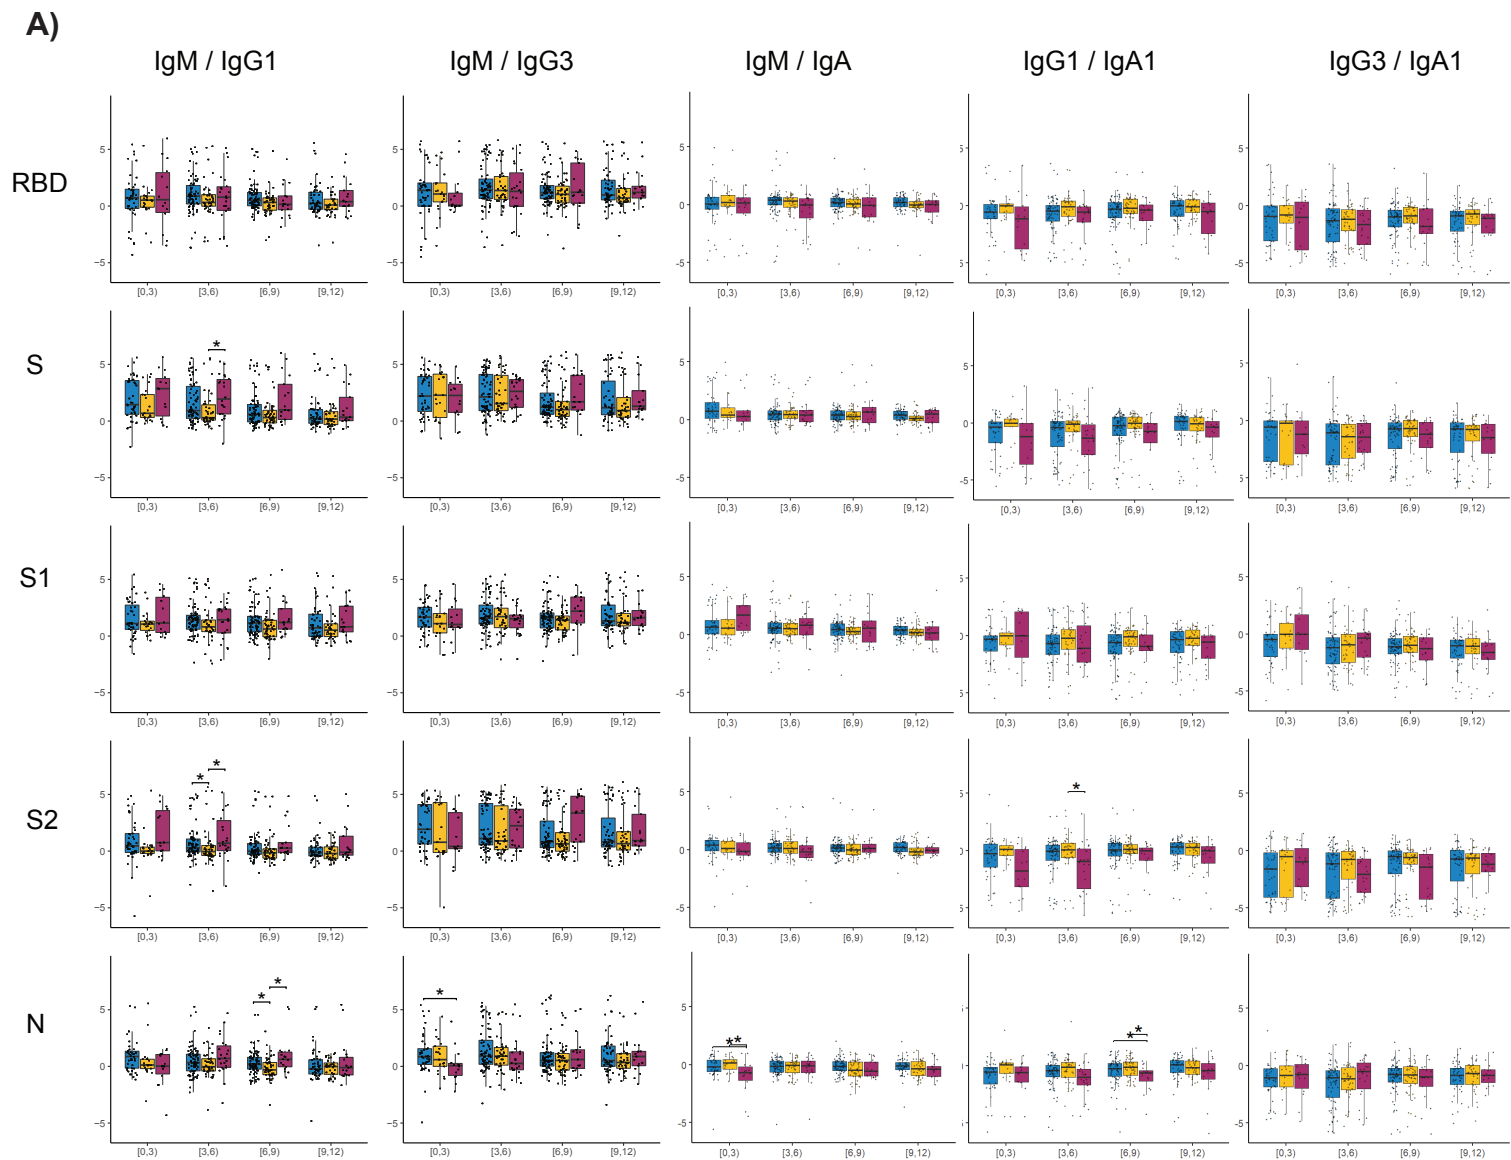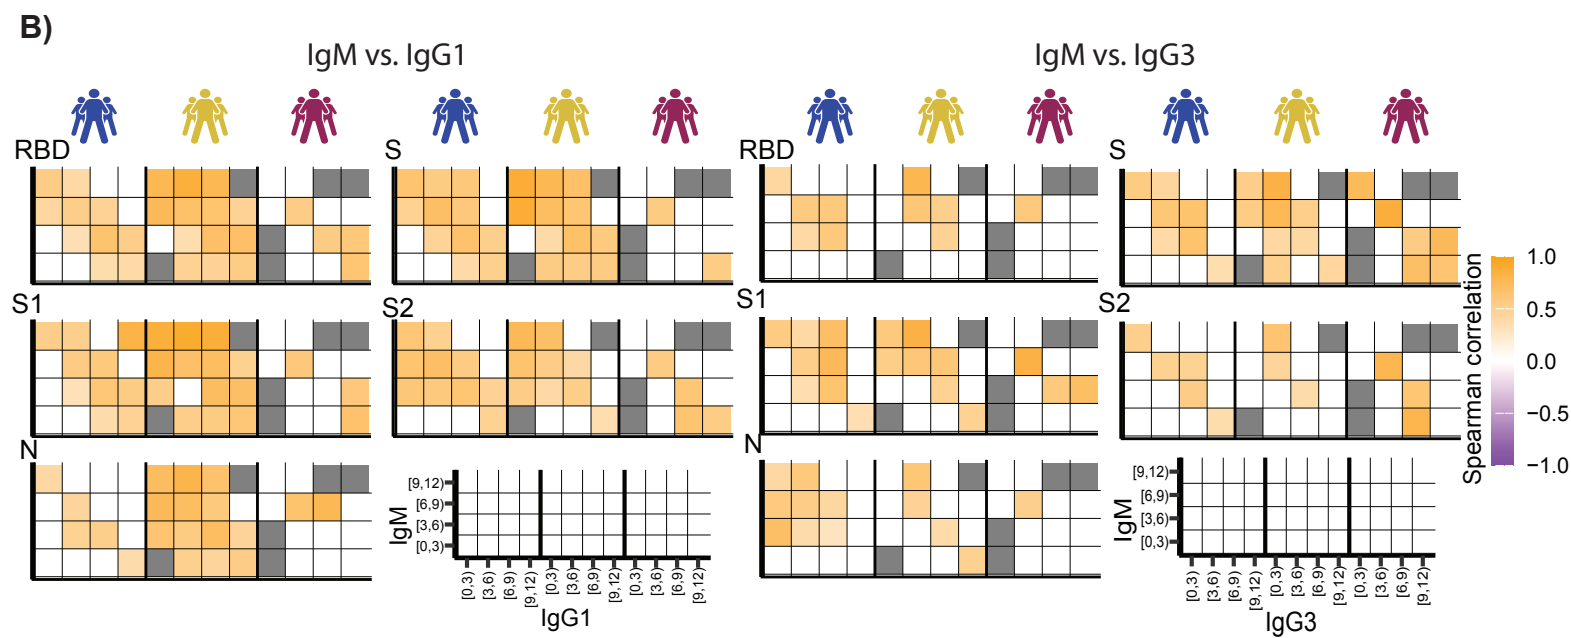

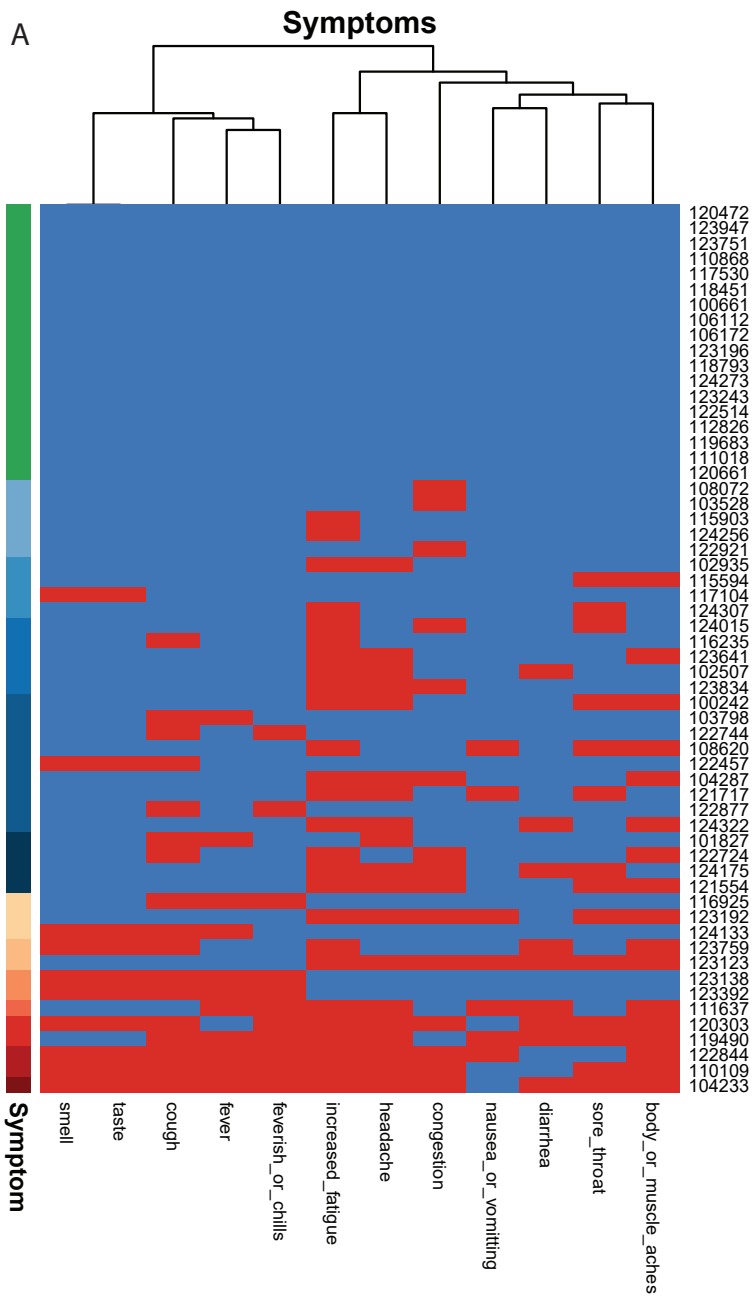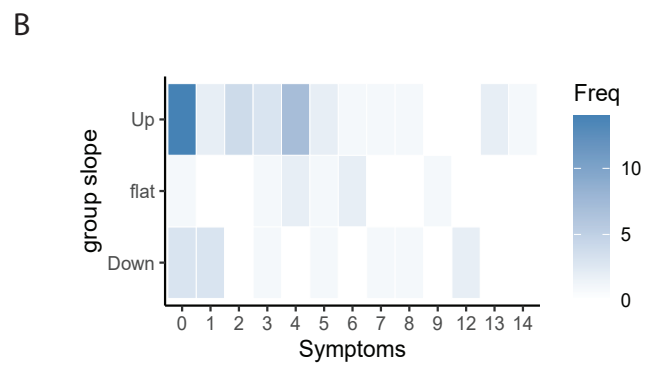

Supplement: media-1.pdf [file media-1.pdf]
